# Supplementary material for: A genome-wide linkage analysis for reproductive traits in F2 Large White × Meishan cross gilts
Source: PubMed Central journal article supplement (PMC4282129; doi:10.1111/age.12123), 2014-01-23

**Figure S3 Interval mapping for QTL with effects on TBA, LS, PS, OR and TN on SSC7.** Chromosome-wide significance level at  $P < 0.05$  (broken red line) and  $P < 0.01$  (solid red line). TBA, total born alive; LS, litter size; PS, prenatal survival; OR, ovulation rate; TN, teat number.

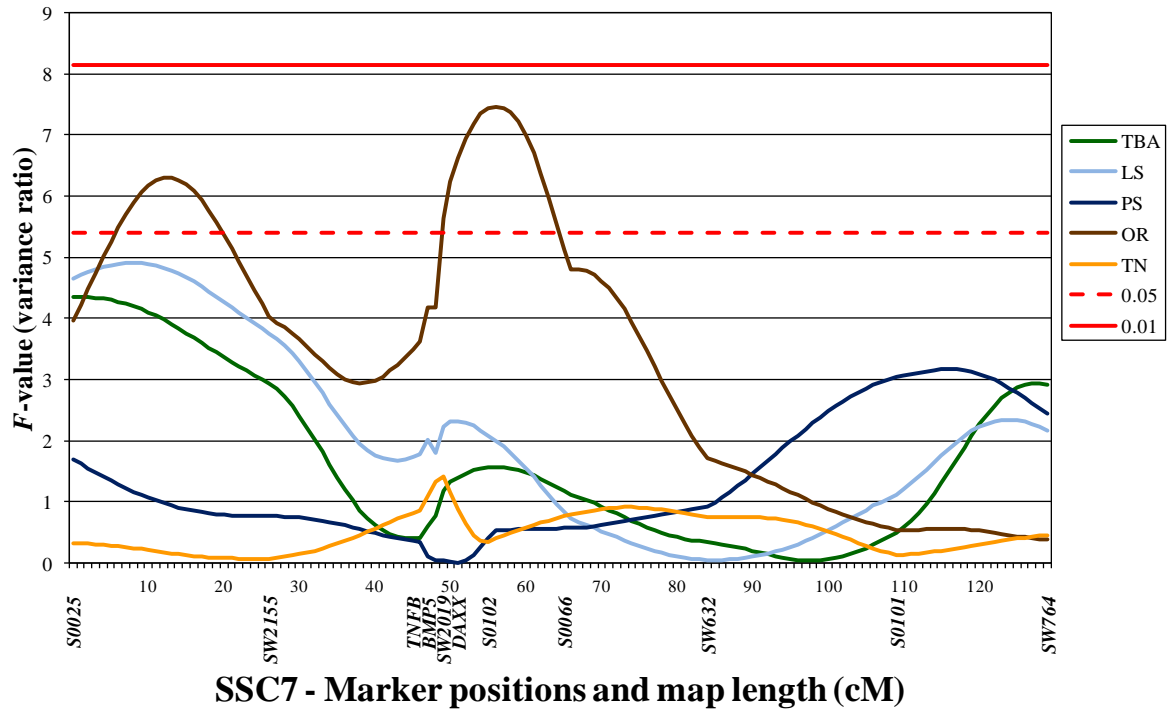

Supplement: age0045-0191-sd5.pdf [file age0045-0191-sd5.pdf]
