# Supplementary material for: A genome-wide linkage analysis for reproductive traits in F2 Large White × Meishan cross gilts
Source: PubMed Central journal article supplement (PMC4282129; doi:10.1111/age.12123), 2014-01-23
Supplement: age0045-0191-sd15.pdf [file age0045-0191-sd15.pdf]

**Table S1 List of markers.** The marker details presented include: location of the marker in the genome (SSC), name of the marker, fluorescent-tag for the labelled primer, primer sequences, size of the product to be amplified (bp), and the optimal annealing temperature (T<sub>m</sub>) for each pair of primers.

| SSC | Marker name         | Primers                        | Primer sequence 5' - 3'                                 | Product size bp | T <sub>m</sub> | BAC clone sequence |
|-----|---------------------|--------------------------------|---------------------------------------------------------|-----------------|----------------|--------------------|
| 1   | <i>CH242-501j10</i> | 501J10-FAM<br>501J10-R         | GGCTCAAGTACCTGGACTTAGTCTGC<br>TGCCACATTTCTAGGCACACAGTT  | 224             | 60             | CU694923           |
| 8   | <i>S0782</i>        | bT139L4SP6-FAM<br>bT139L4SP6-R | GAGGGTGAGAGAGTCAGAGGAGA<br>GATGGTTTCCTGGAAGCAGAGCTA     | 117-167         | 57             | PigE-139L4         |
| 8   | <i>S0792</i>        | bT55F17T7-VIC<br>bT55F17T7-R   | GGAATATTTACGAGATGCTCAA<br>CCCTAGCCTGAGAACCTCCACAT       | 156-192         | 62             | PigE-55F17         |
| 8   | <i>S0793</i>        | bT115B2T7-PET<br>bT115B2T7-R   | CAAGGTGGGAACCAGGCATACATA<br>TCTGTAATCATTTACTGTGGGTGACCA | 111-146         | 55             | PigE-115B2         |
| 8   | <i>S0794</i>        | bT190O14T7-NED<br>bT190O14T7-R | TTCTGCTGCTCAATATTGGACGTT<br>TGGCTGATTCTTGTGAACTGTGA     | 236 -243        | 57             | PigE-190O14        |
| 8   | <i>CH242-238o22</i> | 238o22-PET<br>238o22-R         | CCAAGGCCGTGTGTGAGGATTAT<br>TGGAAAAACACTTCAGGCAACTG      | 199             | 55             | CU606871           |
| 8   | <i>CH242-27o17</i>  | 27o17-NED<br>27o17-R           | CCTTCTCTCTCCCATTTCTTCTC<br>TCCTTCTCTCCTTCTTTGCCTTC      | 195             | 58             | CU633175           |
| 8   | <i>CH242-443f10</i> | 443f10-PET<br>443f10-R         | TCTTTCCAAGGGATCATAAAGTCTGA<br>GGCTCTCTGATCCCAAATCCTGA   | 143             | 50             | CU467102           |
| 5   | <i>GDF11</i>        | GDF11- NED<br>GDF11-R          | CCACTTCTTGTGACTATGTGCAAG<br>GCCATCAGACCATATGGCC         | 113-136         | 58             | -                  |
| 7   | <i>DAXX</i>         | DAXX-NED<br>DAXX-R             | GTGTCAGCAGGCAGGAAGA<br>GTGGCATAGGTTGGTGGC               | 182-196         | 58             | -                  |
| 17  | <i>S0296-2</i>      | S0296-2-PET<br>S0296-2-R       | TGAAAAATAACAAGAACCAC<br>AAAAGCAAATAATGATAATAG           | 161-181         | 50             | -                  |
