# Supplementary material for: A genome-wide linkage analysis for reproductive traits in F2 Large White × Meishan cross gilts
Source: PubMed Central journal article supplement (PMC4282129; doi:10.1111/age.12123), 2014-01-23
Supplement: age0045-0191-sd17.pdf [file age0045-0191-sd17.pdf]

**Table S2 Linkage maps for the 18 porcine autosomal chromosomes and X chromosome.**  
Each map indicates name of chromosome, names of the markers, and position of each marker in cM.

| SSC           | Marker        | Position       | SSC           | Marker         | Position      | SSC           | Marker        | Position       | SSC           | Marker        | Position     |      |
|---------------|---------------|----------------|---------------|----------------|---------------|---------------|---------------|----------------|---------------|---------------|--------------|------|
| 1             | <i>SW1515</i> | 0.0            | 5             | <i>IGF1</i>    | 95.4          | 8             | <i>SW1551</i> | 105.0          | 13            | <i>SW225</i>  | 63.9         |      |
|               | <i>501j10</i> | 0.9            |               | <i>SW1954</i>  | 109.7         |               | <i>SW790</i>  | 106.1          |               | <i>SW398</i>  | 70.5         |      |
|               | <i>SW64</i>   | 9.2            |               | <i>SW967</i>   | 129.4         |               | <i>SW61</i>   | 108.8          |               | <i>SW1056</i> | 81.2         |      |
|               | 2             | <i>S0008</i>   | 24.6          | 6              | <i>S0035</i>  | 0.0           | 9             | <i>S0782</i>   | 112.3         | 14            | <i>SW769</i> | 97.0 |
|               |               | <i>CGA</i>     | 32.9          |                | <i>SW1057</i> | 45.0          |               | <i>SPP1-1</i>  | 121.2         |               | <i>S0215</i> | 97.8 |
|               |               | <i>S0122</i>   | 38.0          | <i>S0220</i>   | 75.4          | <i>SPP1-4</i> |               | 121.2          | <i>SW857</i>  | 0.0           |              |      |
|               |               | <i>S0082</i>   | 50.9          | <i>SW122</i>   | 83.8          | <i>SPP1-5</i> |               | 121.2          | <i>SW2496</i> | 15.3          |              |      |
|               |               | <i>S0155</i>   | 60.1          | <i>SW316</i>   | 88.3          | <i>SPP1-6</i> |               | 121.2          | <i>SW295</i>  | 35.8          |              |      |
| <i>SW1301</i> |               | 100.5          | <i>SW71</i>   | 93.6           | <i>IBSP</i>   | 121.4         |               | <i>SW210</i>   | 41.0          |               |              |      |
| <i>SW2443</i> |               | 0.0            | <i>S0031</i>  | 97.3           | <i>S0792</i>  | 124.4         |               | <i>S0007</i>   | 53.0          |               |              |      |
| <i>SW256</i>  |               | 24.2           | <i>S0228</i>  | 102.1          | <i>SW1980</i> | 125.9         |               | <i>SW761</i>   | 67.9          |               |              |      |
| 3             | <i>SW240</i>  | 48.3           | 7             | <i>S0025</i>   | 0.0           | 10            | <i>443f10</i> | 130.9          | 15            | <i>SW1557</i> | 78.2         |      |
|               | <i>FSHB-2</i> | 58.0           |               | <i>SW2155</i>  | 26.2          |               | <i>KS904</i>  | 131.3          |               | <i>SW2515</i> | 97.2         |      |
|               | <i>SW1026</i> | 64.2           | <i>TNFB</i>   | 46.3           | <i>S0178</i>  |               | 136.2         | <i>SWC27</i>   |               | 100.2         |              |      |
|               | <i>S0091</i>  | 67.3           | <i>BMP5</i>   | 47.3           | 11            |               | <i>SW983</i>  | 0.0            |               | <i>S0355</i>  | 0.0          |      |
|               | <i>SW395</i>  | 68.7           | <i>SW2019</i> | 47.9           |               |               | <i>SW911</i>  | 34.3           |               | <i>S0148</i>  | 12.4         |      |
|               | <i>S0226</i>  | 75.9           | <i>DAXX</i>   | 49.2           |               |               | <i>APOA1</i>  | 58.6           |               | <i>SW964</i>  | 29.5         |      |
|               | <i>SW1695</i> | 82.6           | <i>S0102</i>  | 55.7           |               |               | <i>SW1677</i> | 65.6           |               | <i>S0149</i>  | 38.5         |      |
|               | <i>S0378</i>  | 95.0           | <i>S0066</i>  | 65.7           |               |               | <i>S0295</i>  | 85.5           |               | <i>SW936</i>  | 59.6         |      |
|               | <i>SW1879</i> | 99.7           | <i>SW632</i>  | 84.1           |               |               | <i>SW174</i>  | 104.3          |               | <i>SW1119</i> | 89.8         |      |
|               | <i>S0036</i>  | 135.4          | <i>S0101</i>  | 109.2          |               |               | <i>SW749</i>  | 124.0          |               | 16            | <i>SW742</i> | 0.0  |
| <i>SW274</i>  | 0.0           | <i>SW764</i>   | 129.7         | <i>SW830</i>   |               | 0.0           | <i>SW403</i>  | 17.6           |               |               |              |      |
| 4             | <i>SW72</i>   | 41.5           | 8             | <i>SW2410</i>  |               | 0.0           | <i>SW443</i>  | 29.0           | <i>S0026</i>  | 37.8          |              |      |
|               | <i>SW2527</i> | 58.3           |               | <i>HD-1</i>    |               | 2.5           | <i>S0070</i>  | 65.5           | <i>SW1897</i> | 63.5          |              |      |
|               | <i>SW902</i>  | 69.2           | <i>SW2611</i> | 3.7            | <i>SW1041</i> | 71.6          | 17            | <i>SW335</i>   | 0.0           |               |              |      |
|               | <i>FSHR-1</i> | 85.8           | <i>SW905</i>  | 19.3           | <i>SW951</i>  | 95.3          |               | <i>S0296-2</i> | 27.5          |               |              |      |
|               | <i>FSHR-2</i> | 85.8           | <i>QDPR-1</i> | 32.6           | <i>SWR67</i>  | 111.7         | <i>S0359</i>  | 55.5           |               |               |              |      |
|               | <i>S0167</i>  | 94.8           | <i>SLIT2</i>  | 44.1           | 12            | <i>S0385</i>  | 0.0           | <i>SW2431</i>  | 79.0          |               |              |      |
|               | <i>S0002</i>  | 113.1          | <i>SW7</i>    | 65.2           |               | <i>SW1632</i> | 19.9          | 18             | <i>SW1808</i> | 0.0           |              |      |
|               | <i>SW590</i>  | 139.4          | <i>KIT</i>    | 70.7           |               | <i>SW151</i>  | 40.5          |                | <i>SW2540</i> | 1.3           |              |      |
|               | 5             | <i>S0227</i>   | 0.0           | <i>GNRHR-1</i> |               | 72.8          | <i>S0230</i>  | 48.5           | <i>SY4</i>    | 5.4           |              |      |
|               |               | <i>S0301</i>   | 28.0          | <i>GNRHR-2</i> |               | 72.8          | <i>SW703</i>  | 69.6           | <i>SW1984</i> | 22.6          |              |      |
| <i>S0001</i>  |               | 40.6           | <i>SULTE1</i> | 73.1           |               | 13            | <i>SW2490</i> | 0.0            | <i>SW787</i>  | 24.6          |              |      |
| <i>S0023</i>  |               | 53.6           | <i>S0017</i>  | 73.1           |               |               | <i>S0143</i>  | 5.3            | <i>SW1682</i> | 31.5          |              |      |
| <i>S0217</i>  |               | 54.4           | <i>AREG</i>   | 73.7           |               |               | <i>SW957</i>  | 29.9           | <i>S0062</i>  | 32.3          |              |      |
| <i>S0073</i>  |               | 63.6           | <i>FGG-1</i>  | 75.6           |               |               | <i>SW874</i>  | 50.6           | <i>S0120</i>  | 33.2          |              |      |
| <i>S0214</i>  |               | 66.7           | <i>FGG-2</i>  | 75.6           |               |               | <i>S0090</i>  | 63.0           | <i>S0306</i>  | 37.7          |              |      |
| <i>SW445</i>  |               | 88.2           | <i>S0225</i>  | 89.1           | <i>S0282</i>  |               | 0.0           | <i>SY31</i>    | 52.4          |               |              |      |
| <i>S0097</i>  | 108.4         | <i>S0794</i>   | 90.9          | <i>SW1378</i>  | 14.1          |               | <i>INHBA</i>  | 54.7           |               |               |              |      |
| <i>SW413</i>  | 0.0           | <i>KS192</i>   | 93.5          | <i>S0076</i>   | 25.0          |               | X             | <i>SW2456</i>  | 0.0           |               |              |      |
| <i>SWR453</i> | 40.6          | <i>SW763</i>   | 94.1          | <i>SW344</i>   | 35.3          | <i>SW1943</i> |               | 32.1           |               |               |              |      |
| <i>GDF11</i>  | 52.3          | <i>S0793</i>   | 98.7          | <i>SW2448</i>  | 50.4          | <i>S0218</i>  |               | 66.8           |               |               |              |      |
| <i>DAGK</i>   | 52.8          | <i>238o22b</i> | 101.3         | <i>SW1105</i>  | 56.4          |               |               |                |               |               |              |      |
|               | <i>S0005</i>  | 67.3           | <i>27o17</i>  | 103.0          | <i>S0068</i>  | 57.8          |               |                |               |               |              |      |
